# Supplementary material for: Enhanced removal of Ce(iii) and Sr(ii) ions from aqueous solution using ultrasonication-assisted sawdust-TiO2 sorbent
Source: Royal Society of Chemistry journal article supplement (doi:10.1039/d3ew00283g), 2023-01-01
Supplement: d3ew00283g1.pdf [file d3ew00283g1.pdf]

### List of supplementary

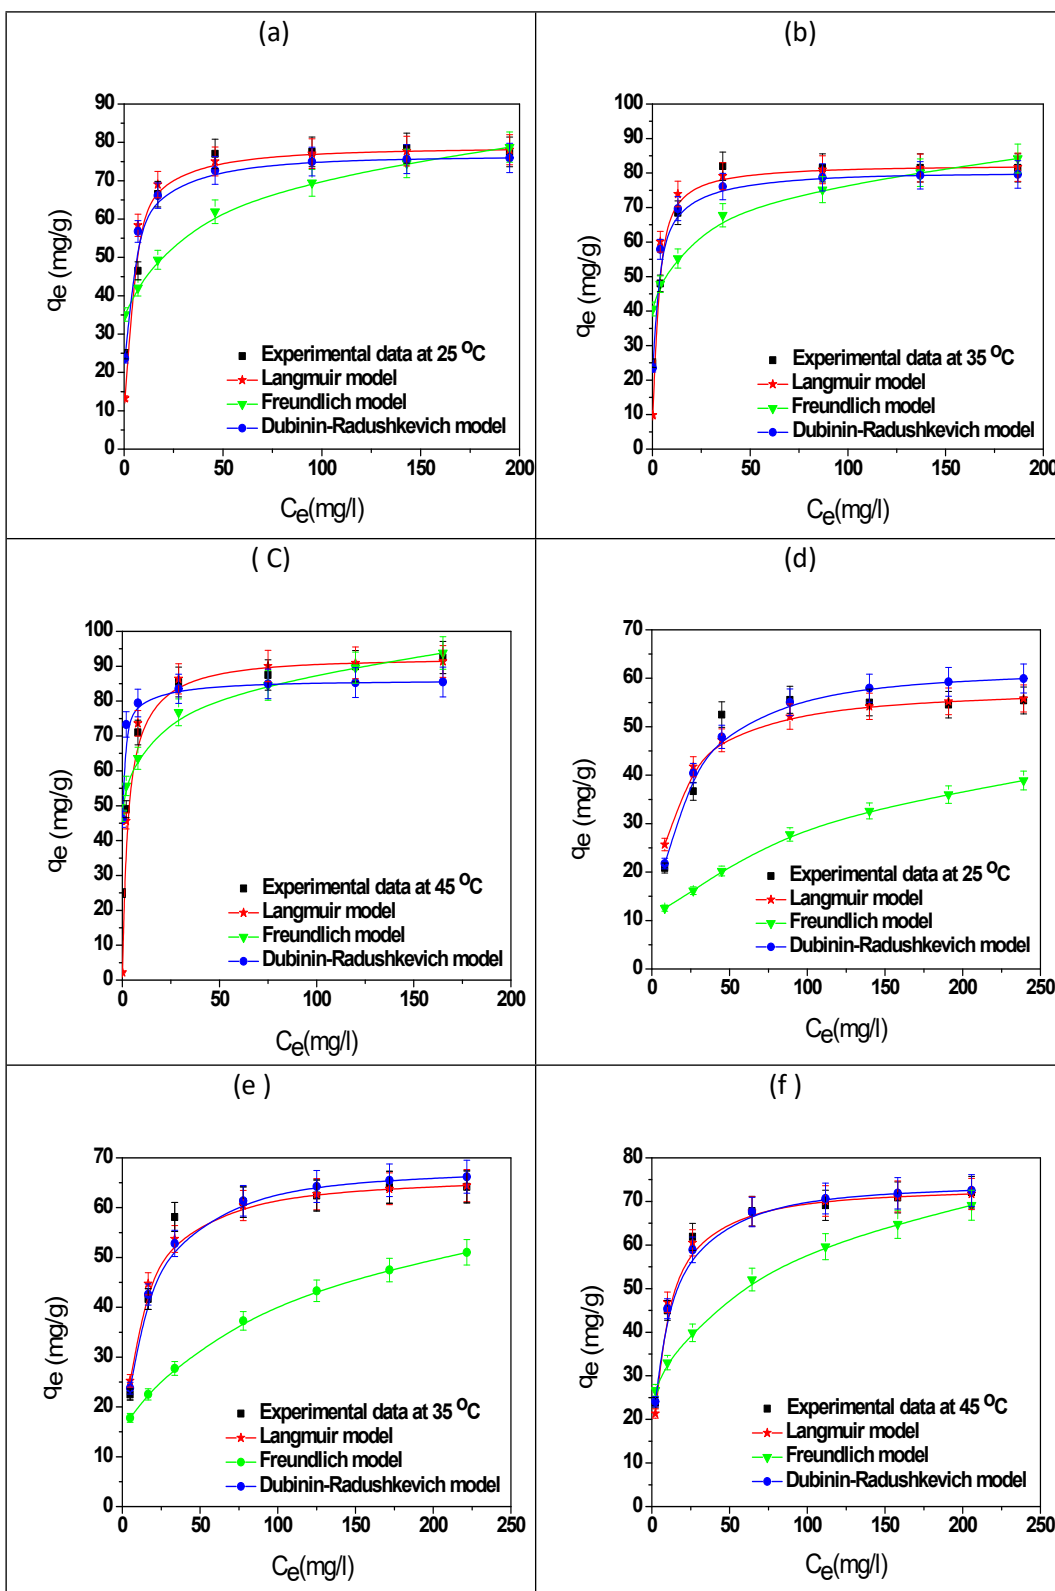

**S1:** Experimental sono-sorption equilibrium isotherms and non-linear models of Sr(II) and Ce(III) ions, respectively onto ST at (a,d) 25°C, (b, e) 35°C, and (c, f) 45°C.
